# Supplementary material for: Blueberry extract attenuates DSS-induced inflammatory bowel disease in mice through inhibiting ER stress-mediated colonic apoptosis in mice
Source: Royal Society of Chemistry journal article supplement (doi:10.1039/d4fo00194j), 2024-01-01

**p-PERK, 125 kDa**

Sample loading order:

Lane 2-5: Control-vehicle/DSS-vehicle/Control-blueberry/DSS-blueberry

Lane 6-9: Control-vehicle/DSS-vehicle/Control-blueberry/DSS-blueberry

Lane 10-13: Control-vehicle/DSS-vehicle/Control-blueberry/DSS-blueberry

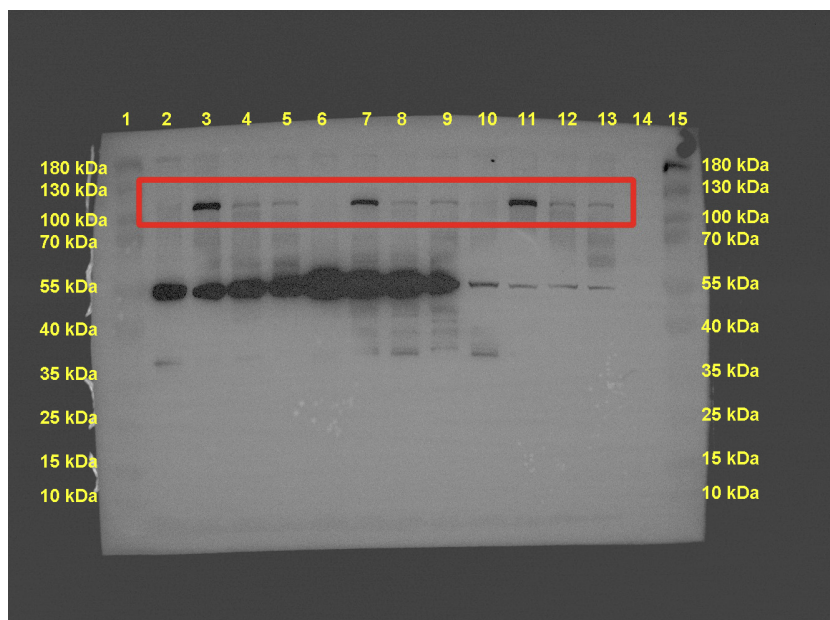

**Same membrane, internal reference, alpha-tubulin, 50 kDa**

Sample loading order:

Lane 2-5: Control-vehicle/DSS-vehicle/Control-blueberry/DSS-blueberry

Lane 6-9: Control-vehicle/DSS-vehicle/Control-blueberry/DSS-blueberry

Lane 10-13: Control-vehicle/DSS-vehicle/Control-blueberry/DSS-blueberry

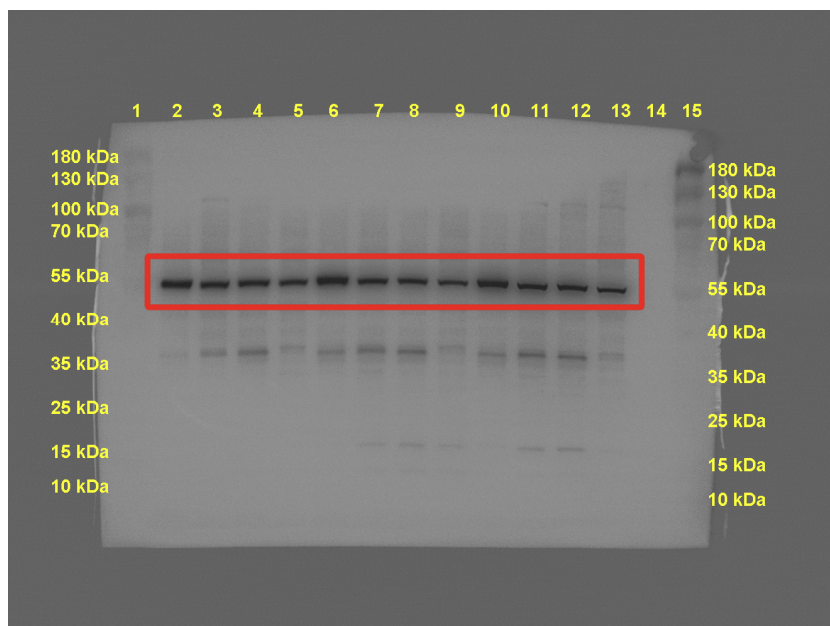

### PERK, 170 kDa

Sample loading order:

Lane 2-5: Control-vehicle/DSS-vehicle/Control-blueberry/DSS-blueberry

Lane 7-10: Control-vehicle/DSS-vehicle/Control-blueberry/DSS-blueberry

Lane 12-15: Control-vehicle/DSS-vehicle/Control-blueberry/DSS-blueberry

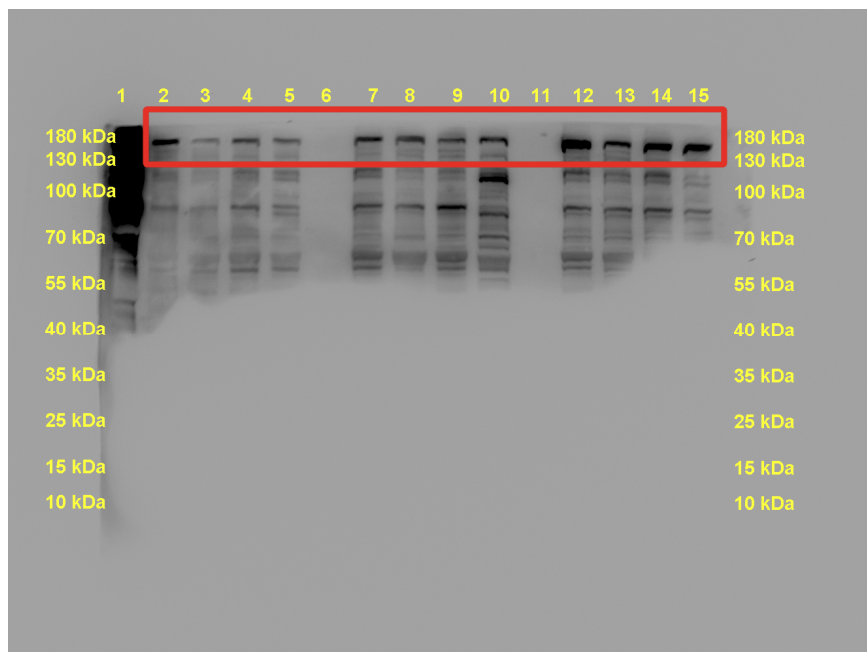

### Same membrane, internal reference, GAPDH, 38 kDa

Sample loading order:

Lane 2-5: Control-vehicle/DSS-vehicle/Control-blueberry/DSS-blueberry

Lane 7-10: Control-vehicle/DSS-vehicle/Control-blueberry/DSS-blueberry

Lane 12-15: Control-vehicle/DSS-vehicle/Control-blueberry/DSS-blueberry

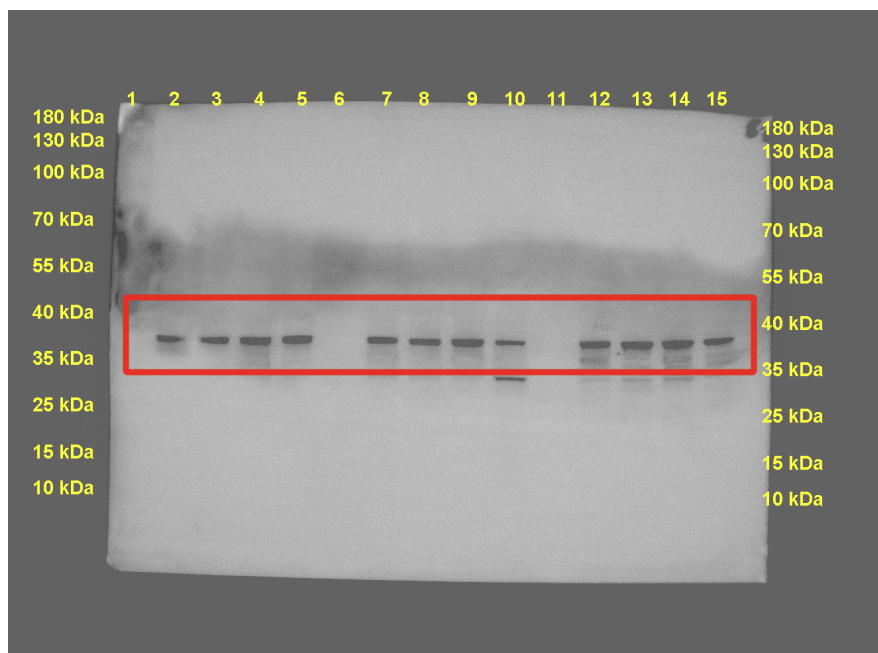

**p-eIF2 $\alpha$ , 36 kDa**

Sample loading order:

Lane 3-6: Control-vehicle/DSS-vehicle/Control-blueberry/DSS-blueberry

Lane 7-10: Control-vehicle/DSS-vehicle/Control-blueberry/DSS-blueberry

Lane 11-14: Control-vehicle/DSS-vehicle/Control-blueberry/DSS-blueberry

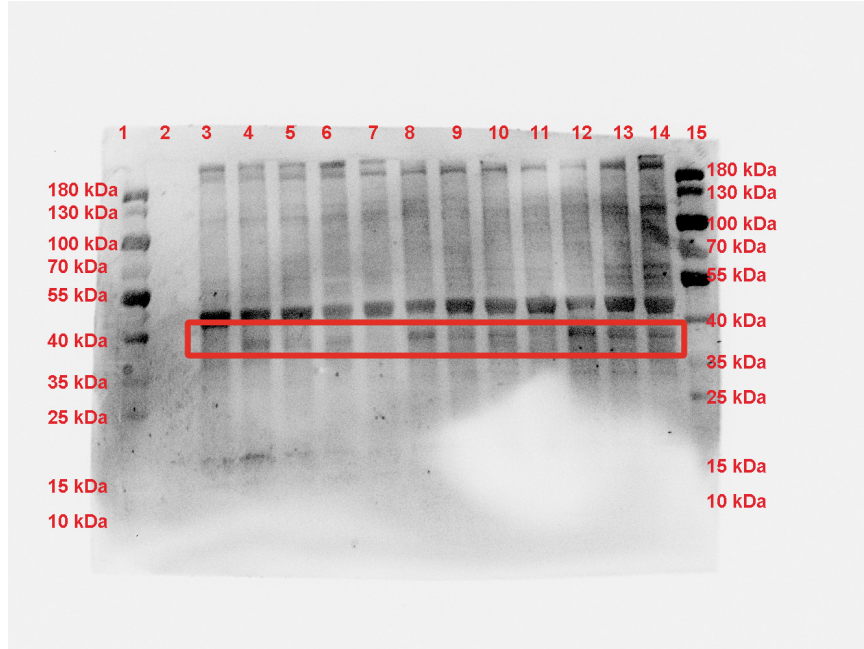

**Same membrane, internal reference, beta-actin, 42 kDa**

Sample loading order:

Lane 3-6: Control-vehicle/DSS-vehicle/Control-blueberry/DSS-blueberry

Lane 7-10: Control-vehicle/DSS-vehicle/Control-blueberry/DSS-blueberry

Lane 11-14: Control-vehicle/DSS-vehicle/Control-blueberry/DSS-blueberry

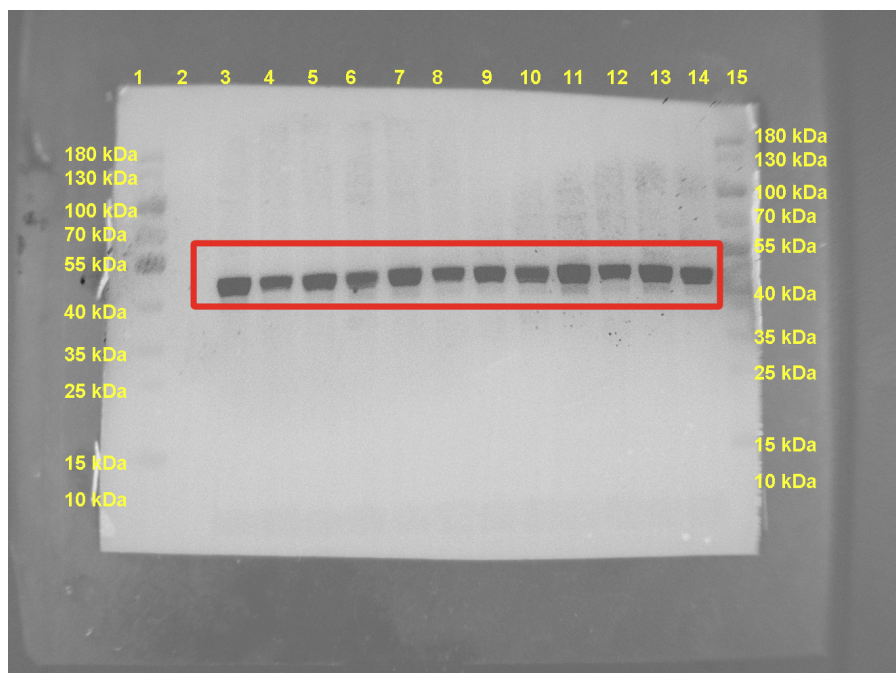

**eIF2 $\alpha$ , 36 kDa**

Sample loading order:

Lane 1-4: Control-vehicle/DSS-vehicle/Control-blueberry/DSS-blueberry

Lane 6-9: Control-vehicle/DSS-vehicle/Control-blueberry/DSS-blueberry

Lane 11-14: Control-vehicle/DSS-vehicle/Control-blueberry/DSS-blueberry

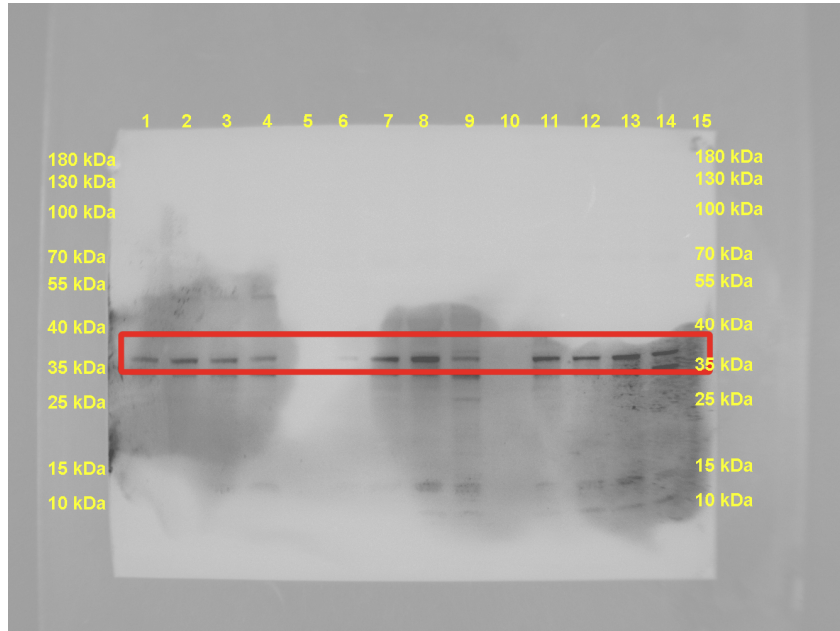

**Same membrane, internal reference, GAPDH, 38 kDa**

Sample loading order:

Lane 1-4: Control-vehicle/DSS-vehicle/Control-blueberry/DSS-blueberry

Lane 6-9: Control-vehicle/DSS-vehicle/Control-blueberry/DSS-blueberry

Lane 11-14: Control-vehicle/DSS-vehicle/Control-blueberry/DSS-blueberry

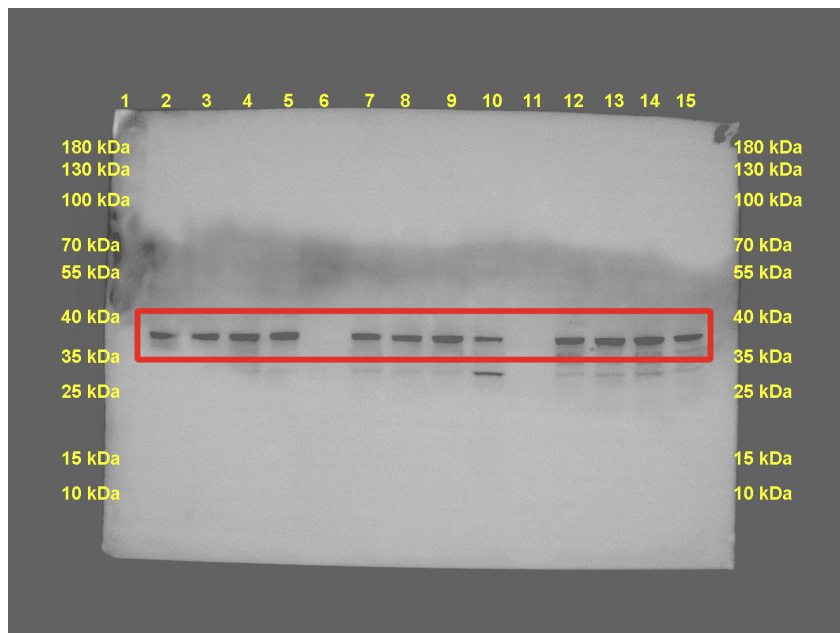

### ATF4, 50 kDa

Sample loading order:

Lane 2-5: Control-vehicle/DSS-vehicle/Control-blueberry/DSS-blueberry

Lane 6-9: Control-vehicle/DSS-vehicle/Control-blueberry/DSS-blueberry

Lane 10-13: Control-vehicle/DSS-vehicle/Control-blueberry/DSS-blueberry

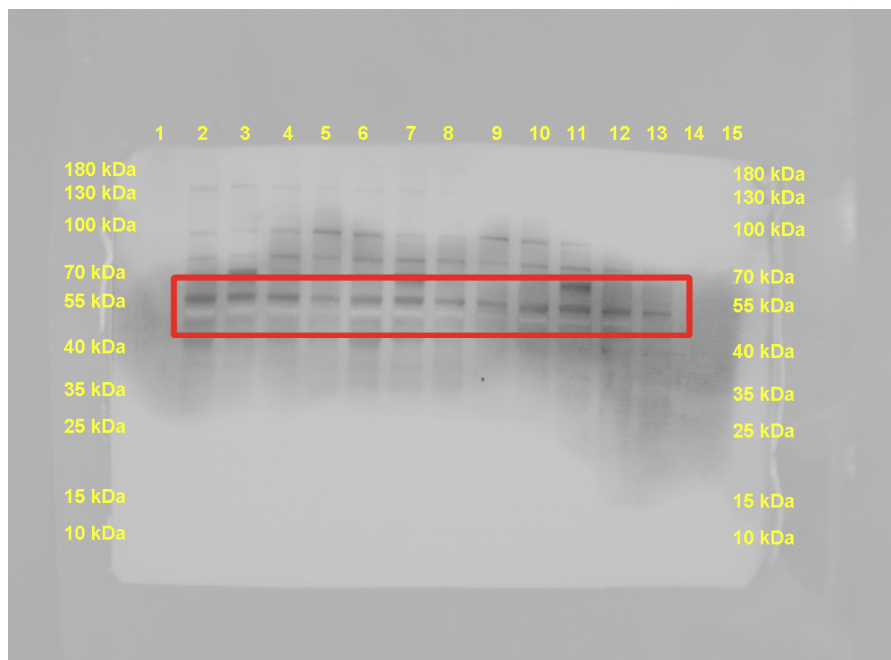

### Same membrane, internal reference, GAPDH, 38 kDa

Sample loading order:

Lane 2-5: Control-vehicle/DSS-vehicle/Control-blueberry/DSS-blueberry

Lane 6-9: Control-vehicle/DSS-vehicle/Control-blueberry/DSS-blueberry

Lane 10-13: Control-vehicle/DSS-vehicle/Control-blueberry/DSS-blueberry

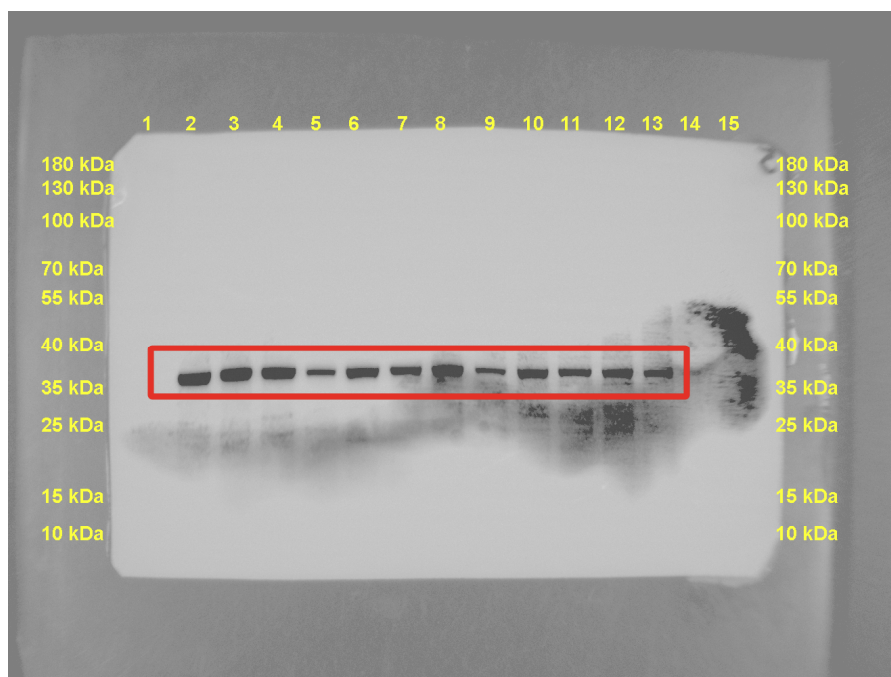

### CHOP, 37 kDa

Sample loading order:

Lane 2-5: Control-vehicle/DSS-vehicle/Control-blueberry/DSS-blueberry

Lane 6-9: Control-vehicle/DSS-vehicle/Control-blueberry/DSS-blueberry

Lane 10-13: Control-vehicle/DSS-vehicle/Control-blueberry/DSS-blueberry

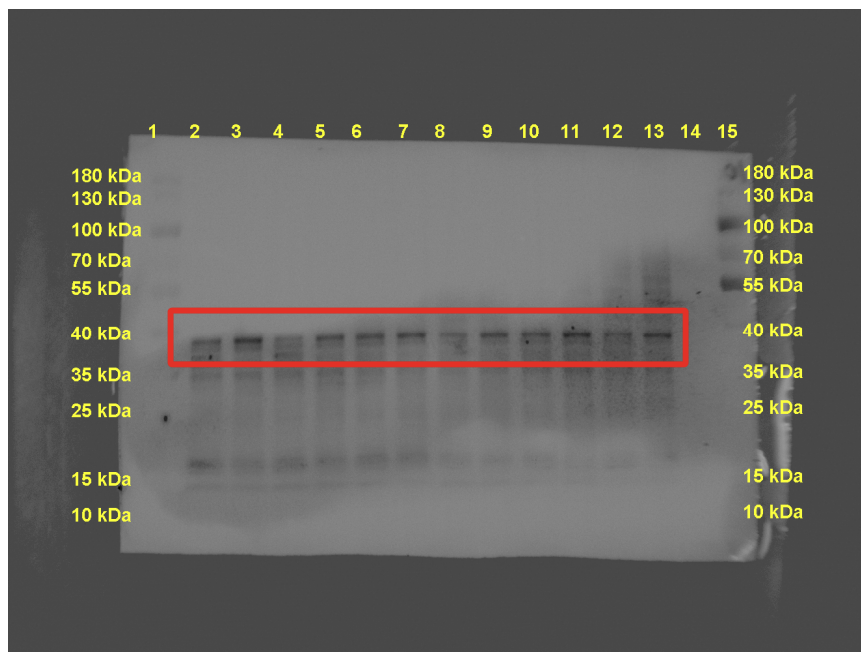

### Same membrane, internal reference, GAPDH, 38 kDa

Sample loading order:

Lane 2-5: Control-vehicle/DSS-vehicle/Control-blueberry/DSS-blueberry

Lane 6-9: Control-vehicle/DSS-vehicle/Control-blueberry/DSS-blueberry

Lane 10-13: Control-vehicle/DSS-vehicle/Control-blueberry/DSS-blueberry

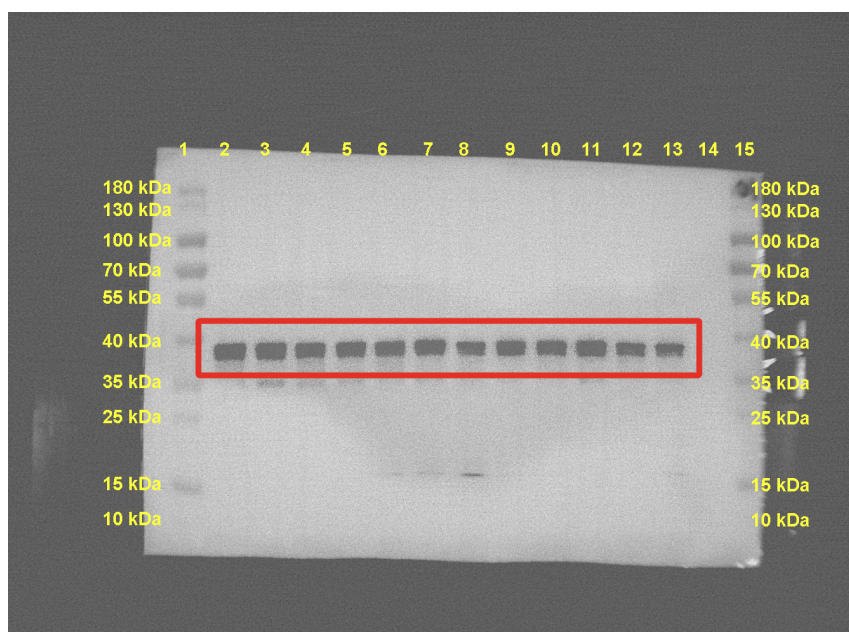

### Caspase-3, 17,19 kDa

Sample loading order:

Lane 2-5: Control-vehicle/DSS-vehicle/Control-blueberry/DSS-blueberry

Lane 6-9: Control-vehicle/DSS-vehicle/Control-blueberry/DSS-blueberry

Lane 10-13: Control-vehicle/DSS-vehicle/Control-blueberry/DSS-blueberry

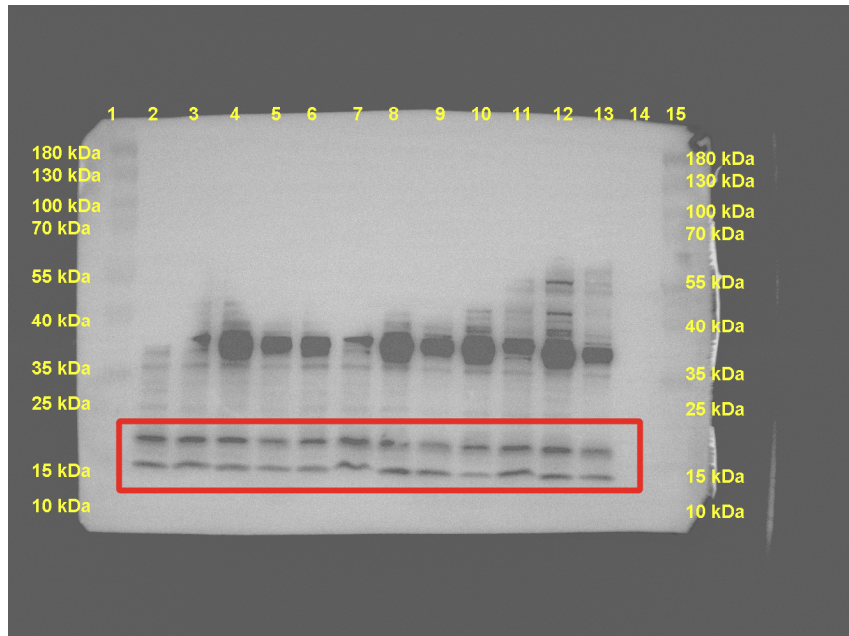

### Same membrane, internal reference, GAPDH, 38 kDa

Sample loading order:

Lane 2-5: Control-vehicle/DSS-vehicle/Control-blueberry/DSS-blueberry

Lane 6-9: Control-vehicle/DSS-vehicle/Control-blueberry/DSS-blueberry

Lane 10-13: Control-vehicle/DSS-vehicle/Control-blueberry/DSS-blueberry

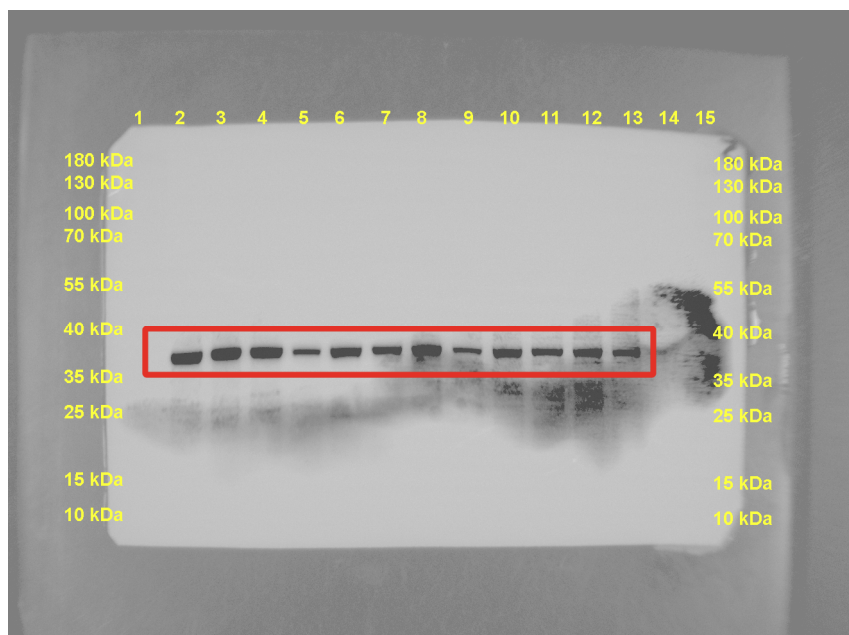

**Bcl-2, 26 kDa**

Sample loading order:

Lane 1-4: Control-vehicle/DSS-vehicle/Control-blueberry/DSS-blueberry

Lane 6-9: Control-vehicle/DSS-vehicle/Control-blueberry/DSS-blueberry

Lane 11-14: Control-vehicle/DSS-vehicle/Control-blueberry/DSS-blueberry

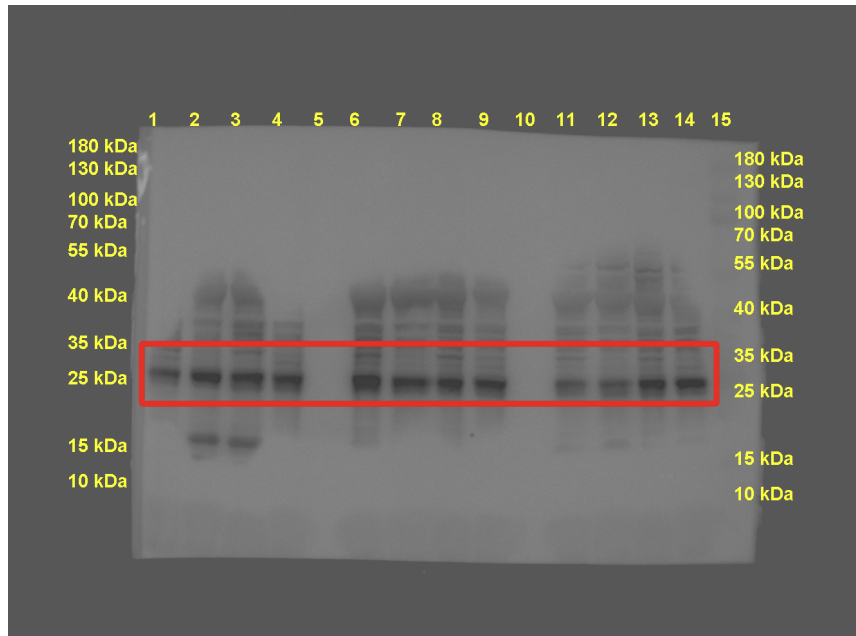

**Same membrane, internal reference, GAPDH, 38 kDa**

Sample loading order:

Lane 1-4: Control-vehicle/DSS-vehicle/Control-blueberry/DSS-blueberry

Lane 6-9: Control-vehicle/DSS-vehicle/Control-blueberry/DSS-blueberry

Lane 11-14: Control-vehicle/DSS-vehicle/Control-blueberry/DSS-blueberry

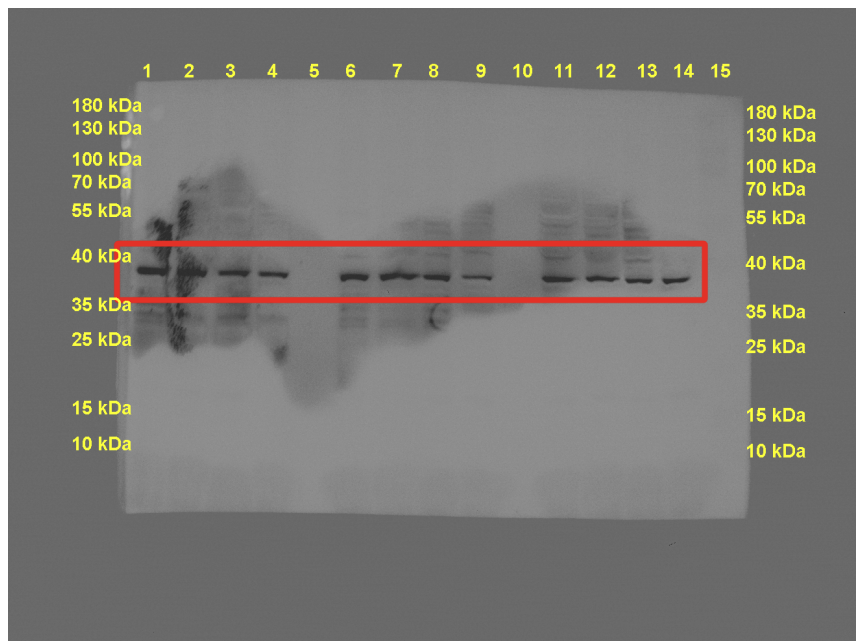



### Bcl-xl, 36 kDa

Sample loading order:

Lane 1-4: Control-vehicle/DSS-vehicle/Control-blueberry/DSS-blueberry

Lane 6-9: Control-vehicle/DSS-vehicle/Control-blueberry/DSS-blueberry

Lane 11-14: Control-vehicle/DSS-vehicle/Control-blueberry/DSS-blueberry

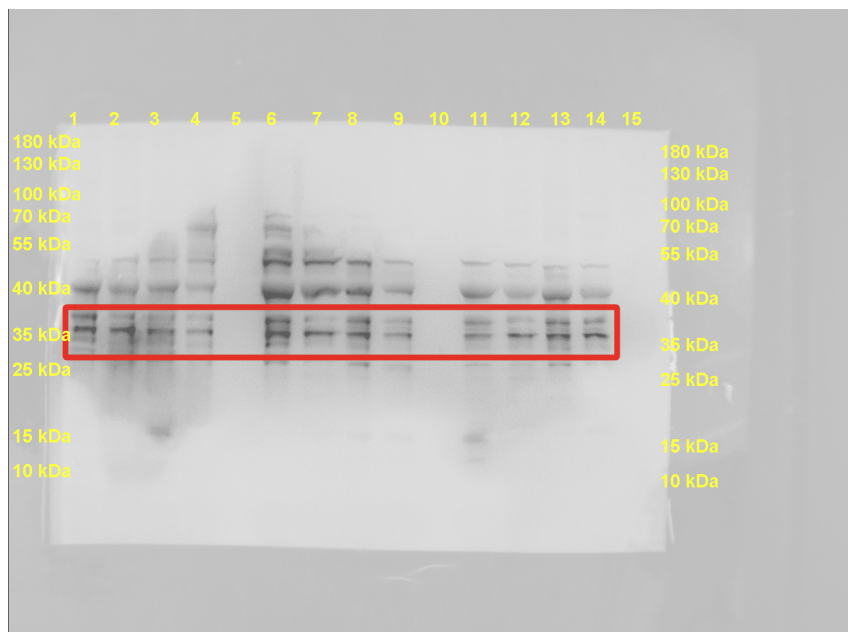

### Same membrane, internal reference, GAPDH, 38 kDa

Sample loading order:

Lane 1-4: Control-vehicle/DSS-vehicle/Control-blueberry/DSS-blueberry

Lane 6-9: Control-vehicle/DSS-vehicle/Control-blueberry/DSS-blueberry

Lane 11-14: Control-vehicle/DSS-vehicle/Control-blueberry/DSS-blueberry

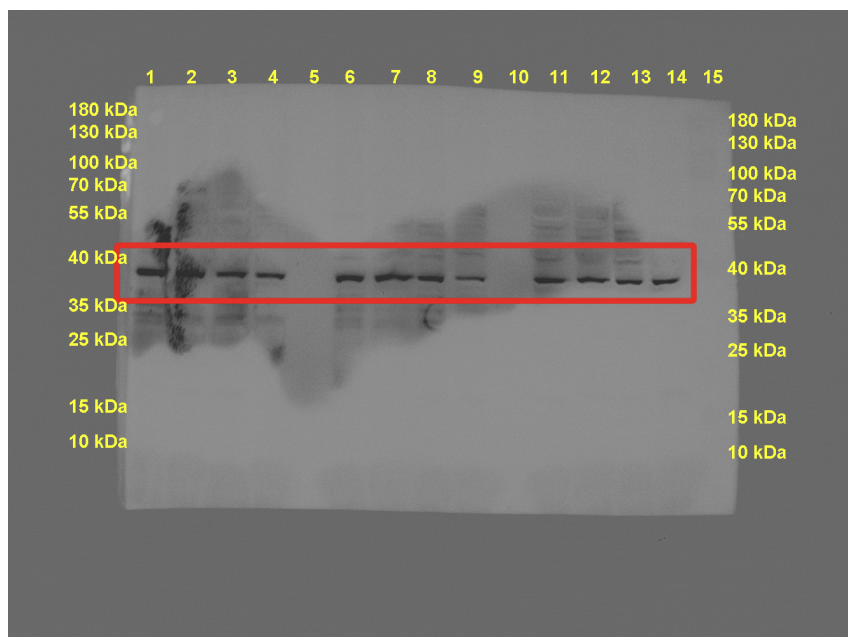

Supplement: d4fo00194j2.pdf [file d4fo00194j2.pdf]
