# Supplementary material for: Blueberry extract attenuates DSS-induced inflammatory bowel disease in mice through inhibiting ER stress-mediated colonic apoptosis in mice
Source: Royal Society of Chemistry journal article supplement (doi:10.1039/d4fo00194j), 2024-01-01
Supplement: d4fo00194j1.pdf [file d4fo00194j1.pdf]

**Supplementary Table 1 Identification of anthocyanins in blueberry extracts by LC-MS**

| Chemical Name                                                                                      | Formula    | Retention time | Theoretical m/z | Experimental m/z | Chemotaxonomic |
|----------------------------------------------------------------------------------------------------|------------|----------------|-----------------|------------------|----------------|
| Cyanidin 3-O-(2-xylosyl-6-(6'-caffeoyl-glucosyl)-galactoside)                                      | C41H45O23  | 358.6          | 905.2454        | 905.235152       | cyanidin       |
| Cyanidin 3-(6"-p-coumarylglucoside)-5-4''',6'''-dimalonylglucoside)                                | C42H41O24  | 366.1          | 929.2151        | 929.1987686      | cyanidin       |
| Malvidin 3-glucoside-5-(2"-sulfatoglucoside)                                                       | C29H35O20S | 369.1          | 735.148         | 735.144233       | Malvidin       |
| Cyanin chloride                                                                                    | C27H31O16  | 393.2          | 611.1563        | 611.1612026      | cyanidin       |
| Cyanidin 3-(disinapoylsophoroside) 5-glucoside                                                     | C55H61O29  | 394.7          | 1185.323        | 1185.329836      | cyanidin       |
| Cyanidin 3- (6-malylglucoside)                                                                     | C25H25O15  | 415.2          | 565.1188        | 565.11934        | cyanidin       |
| Cyanidin 3-O- [ beta-D-glucopyranoside ] -7,3'-di-O- [ 6-O-(sinapyl) -beta-D-glucopyranoside ]     | C55H61O29  | 445.0          | 1185.3074       | 1185.329836      | cyanidin       |
| Myrtillin                                                                                          | C21H21O12  | 449.2          | 465.1022        | 465.1032966      | delphinidin    |
| Cyanidin 3,3'-di-glucoside-7- (6"-caffeoylglucoside)                                               | C42H47O24  | 455.1          | 935.2608        | 935.2457162      | cyanidin       |
| Cyanidin 3-diglucoside 5-glucoside                                                                 | C33H41O21  | 460.8          | 773.2065        | 773.2140236      | cyanidin       |
| Cyanidin 3- (2-glucosyl-6-caffeoylglucoside)                                                       | C36H37O19  | 460.8          | 773.1913        | 773.1928952      | cyanidin       |
| 3,5-Bis(beta-D-glucopyranosyloxy)-7-hydroxy-2-(4-hydroxy-3-methoxyphenyl)-1-benzopyrylium chloride | C28H33O16  | 462.3          | 625.1773        | 625.1768518      | Peonidin       |
| Cyanidin 3-O-sophoroside                                                                           | C27H31O16  | 463.8          | 611.1639        | 611.1612026      | cyanidin       |
| Cyanidin 3-arabinoside-5-glucoside                                                                 | C26H29O15  | 468.2          | 581.1435        | 581.1506384      | cyanidin       |
| Idaein                                                                                             | C21H21O11  | 480.8          | 449.1078        | 449.1083816      | cyanidin       |
| Cyanidin 3- (2G-galloylrutinoside)                                                                 | C34H35O19  | 501.2          | 747.1674        | 747.177246       | cyanidin       |
| Cyanidin 3-O-rutinoside 5-O-beta-D-glucoside                                                       | C33H41O20  | 502.6          | 757.2155        | 757.2191086      | cyanidin       |
| Keracyanin                                                                                         | C27H31O15  | 511.6          | 595.1646        | 595.1662876      | cyanidin       |
| Cyanidin 3-O-(beta-D-xylosyl-(1->2)-beta-D-galactoside)                                            | C26H29O15  | 513.1          | 581.1448        | 581.1506384      | cyanidin       |
| Petunidin 3-galactoside                                                                            | C22H23O12  | 514.6          | 479.1192        | 479.1189458      | Petunidin      |
| Peonidin 3-gentiotrioside                                                                          | C34H43O21  | 518.7          | 787.2364        | 787.2296728      | Peonidin       |
| Peonidin 3-(6"-caffeylglucoside)                                                                   | C31H29O14  | 522.9          | 625.1603        | 625.1557234      | peonidin       |
| Pelargonidin 3-glucoside                                                                           | C21H21O10  | 527.4          | 433.1118        | 433.1134666      | Pelargonidin   |

|                                                                                 |           |       |           |             |             |
|---------------------------------------------------------------------------------|-----------|-------|-----------|-------------|-------------|
| Petunin                                                                         | C28H33O17 | 530.3 | 641.173   | 641.1717668 | petunidin   |
| Cyanidin 3,5-di-(6-malonylglucoside)                                            | C33H35O22 | 531.9 | 783.1632  | 783.161991  | cyanidin    |
| Cyanidin 3-(6''-(Z)-p-coumarylsophoroside)                                      | C36H37O18 | 531.9 | 757.2131  | 757.1979802 | cyanidin    |
| 5-Carboxypyranocyanidin 3-O-beta-glucopyranoside                                | C24H21O13 | 533.3 | 517.0987  | 517.0982116 | cyanidin    |
| Cyanidin 3-O-(2''-O-galloyl-6''-O-alpha-rhamnopyranosyl-beta-galactopyranoside) | C34H35O19 | 534.8 | 747.1772  | 747.177246  | cyanidin    |
| Delphinidin                                                                     | C15H11O7  | 537.7 | 303.0491  | 303.0504756 | Delphinidin |
| Peonidin 3-galactoside                                                          | C22H23O11 | 546.4 | 463.1271  | 463.1240308 | Peonidin    |
| Cyanidin 3-O-(2-O-beta-D-glucuronosyl)-beta-D-glucoside                         | C27H29O17 | 558.0 | 625.1297  | 625.1404684 | cyanidin    |
| Oenin                                                                           | C23H25O12 | 558.0 | 493.1396  | 493.134595  | malvidin    |
| Cyanidin 3-(2''-glucuronosylglucoside)                                          | C27H29O17 | 560.9 | 625.1776  | 625.1404684 | cyanidin    |
| Peonidin 3-rhamnoside 5-glucoside                                               | C28H33O15 | 563.8 | 609.1769  | 609.1819368 | peonidin    |
| Cyanidin-3-O-arabinoside chloride                                               | C20H19O10 | 565.2 | 419.0956  | 419.0978174 | cyanidin    |
| Peonidin 3-[2-(xylosyl)galactoside]                                             | C27H31O15 | 568.2 | 595.1751  | 595.1662876 | peonidin    |
| Cyanidin 3-(2-galloyl)galactoside)                                              | C28H25O15 | 578.4 | 601.1193  | 601.11934   | cyanidin    |
| Cyanidin 3-O-(6-O-malonyl-beta-D-glucoside)                                     | C24H23O14 | 579.7 | 535.1081  | 535.1087758 | cyanidin    |
| Peonidin 3-(6''-p-coumaroyl-glucoside) 5-glucoside                              | C38H41O17 | 582.7 | 769.2427  | 769.2343636 | Peonidin    |
| Cyanidin 3-(6-caFFEyl-2'-sinapylsambubioside) -5-(6-malonylglucoside)           | C55H57O30 | 582.7 | 1197.2727 | 1197.293452 | cyanidin    |
| Malvidin 3-rhamnoside                                                           | C23H25O11 | 588.6 | 477.1439  | 477.13968   | Malvidin    |
| Delphin                                                                         | C27H31O17 | 590.1 | 627.1531  | 627.1561176 | Delphinidin |
| Delphinidin 3-caFFEoylglucoside                                                 | C30H27O15 | 597.3 | 627.1347  | 627.1349892 | delphinidin |
| Malvidin 3-(malonyl)glucoside                                                   | C26H27O15 | 606.4 | 579.1338  | 579.1349892 | Malvidin    |
| Cyanidin                                                                        | C15H11O6  | 616.8 | 287.0529  | 287.0555606 | cyanidin    |
| Malvidin 3-(6''-acetyl-galactoside)                                             | C25H27O13 | 625.5 | 535.1464  | 535.1451592 | Malvidin    |
| Cyanidin 3-rhamnoside                                                           | C21H21O10 | 627.0 | 433.1137  | 433.1134666 | cyanidin    |
| Peonidin 3-(6''-malonyl-glucoside)                                              | C25H25O14 | 627.0 | 549.1376  | 549.124425  | Peonidin    |
| Malvidin 3-gentiotrioside                                                       | C35H45O22 | 633.1 | 817.256   | 817.240237  | Malvidin    |
| Delphinidin 3-(6-rhamnosyl)galactoside)                                         | C27H31O16 | 633.1 | 611.1633  | 611.1612026 | delphinidin |

|                                                                                             |                 |           |          |             |              |          |
|---------------------------------------------------------------------------------------------|-----------------|-----------|----------|-------------|--------------|----------|
| Cyanidin 3-(6"-acetyl)galactoside                                                           | C23H23O12       | 633.1     | 491.1201 | 491.1189458 | cyanidin     |          |
| Delphinidin 3- (6"-p-coumarylglucoside)                                                     | C30H27O14       | 633.1     | 611.1466 | 611.1400742 | delphinidin  |          |
| Petunidin                                                                                   | C16H13O7        | 634.6     | 317.0681 | 317.0661248 | Petunidin    |          |
| Malvidin 3-arabinoside                                                                      | C22H23O11       | 644.9     | 463.1196 | 463.1240308 | Malvidin     |          |
| Petunidin 3-gentiotrioside                                                                  | C34H43O22       | 656.7     | 803.2336 | 803.2245878 | Petunidin    |          |
| Apigeninidin 5- (5-caFFEylarabinoside)                                                      | C29H25O11       | 661.2     | 549.1225 | 549.13968   | Apigeninidin |          |
| Delphinidin 3-robinobioside-5-glucoside                                                     | C33H41O21       | 662.8     | 773.2209 | 773.2140236 | Delphinidin  |          |
| Pelargonidin chloride                                                                       | C15H11O5        | 670.2     | 271.0581 | 271.0606456 | Pelargonidin |          |
| Malvidin 3-glucoside-4-vinylguaiacol                                                        | C32H31O14       | 671.8     | 639.172  | 639.1713726 | Malvidin     |          |
| 3-O-[b-D-Xylopyranosyl-(1->2)-(4-hydroxycinnamoyl)-(->6)-b-D-glucopyranoside](E)-           | C35H35O17       | 673.3     | 727.184  | 727.187416  | cyanidin     |          |
| Cyanidin 2G-(xylosylrutinoside)                                                             | C32H39O19       | 673.3     | 727.1995 | 727.2085444 | cyanidin     |          |
| Peonidin 3-(6"-acetyl-galactoside)                                                          | C24H25O12       | 674.8     | 505.1348 | 505.134595  | peonidin     |          |
| Malvidin chloride                                                                           | C17H15O7        | 676.3     | 331.0798 | 331.081774  | Malvidin     |          |
| Cyanidin 3-(4"-malonyl-2"-glucuronosylglucoside)                                            | C30H31O20       | 685.2     | 711.1497 | 711.1408626 | cyanidin     |          |
| Pelargonidin 3-O-[2-O-(beta-D-xylopyranosyl)-6-O-(methyl-malonyl)-bata-D-galactopyranoside] | C30H33O17       | 688.3     | 665.1682 | 665.1717668 | Pelargonidin |          |
| Petunidin-3-O-galactoside                                                                   | C22H25O12       | 701.7     | 481.126  | 481.134595  | petunidin    |          |
| Malvin                                                                                      | C29H35O17       | 704.7     | 655.1865 | 655.187416  | Malvidin     |          |
| Malvidin 3-(6-malonylglucoside) 5-glucoside                                                 | C32H37O20       | 706.2     | 741.1994 | 741.1878102 | Malvidin     |          |
| Delphinidin 3-(6"-malonylsambubioside)                                                      | C29H31O19       | 710.8     | 683.189  | 683.1459476 | Delphinidin  |          |
| Cyanidin 3-(6"-coumaroyl)glucoside                                                          | C30H27O13       | 710.8     | 595.1469 | 595.1451592 | cyanidin     |          |
| Petunidin 3-rutinoside                                                                      | C28H33O16       | 710.8     | 625.168  | 625.1768518 | petunidin    |          |
| Petunidin 3-(6"-p-coumaroyl-galactoside)                                                    | C31H29O14       | 710.8     | 625.1545 | 625.1557234 | petunidin    |          |
| pelargonidin-3-O-rutinoside                                                                 | C27H30O14       | 738.1     | 578.1602 | 578.163548  | Pelargonidin |          |
| Petunidin 3-glucoside-5- (6-acetylglucoside)                                                | C30H35O18       | 741.1     | 683.1891 | 683.182331  | Petunidin    |          |
| Peonidin 3-(6"-p-coumaroyl-galactoside)                                                     | C31H29O13       | 744.1     | 609.1591 | 609.1608084 | peonidin     |          |
| 5,7-dihydroxy-2-(4-hydroxy-3,5-dimethoxyphenyl)chromenium-3-yl                              | 6-O-[(2E)-3-(4- | C32H31O14 | 745.5    | 639.1684    | 639.1713726  | malvidin |

|                                                                    |           |       |          |             |              |
|--------------------------------------------------------------------|-----------|-------|----------|-------------|--------------|
| hydroxyphenyl)prop-2-enoyl]-beta-D-glucopyranoside                 |           |       |          |             |              |
| Malvidin 3-rhamnoside-5-glucoside                                  | C29H35O16 | 745.5 | 639.1875 | 639.192501  | malvidin     |
| Luteolinidin 5,7-diglucoside                                       | C27H31O15 | 753.1 | 595.1594 | 595.1662876 | Luteolinidin |
| Petunidin 3- (6"-acetylglucoside)                                  | C24H25O13 | 760.6 | 521.1347 | 521.12951   | petunidin    |
| 6-Hydroxypelargonidin 3-glucoside                                  | C21H21O11 | 769.6 | 449.1077 | 449.1083816 | Pelargonidin |
| Apigeninidin 5,7-diglucoside                                       | C27H31O14 | 788.9 | 579.1438 | 579.1713726 | Apigeninidin |
| 3-Ferulylpelargonidin 5-glucoside                                  | C31H29O13 | 796.4 | 609.166  | 609.1608084 | Pelargonidin |
| Delphinidin 3'-O-(2"-O-galloyl-6"-O-acetyl-beta-galactopyranoside) | C30H27O17 | 806.9 | 659.1242 | 659.1248192 | Delphinidin  |
| Malvidin 3-O-rutinoside-5-O-glucoside                              | C35H45O21 | 808.4 | 801.235  | 801.245322  | Malvidin     |
| 5-Methylcyanidin 3-glucoside                                       | C22H23O11 | 815.8 | 463.1266 | 463.1240308 | cyanidin     |
| Cyanidin 3-O-(6"-malonyl-arabinoside)                              | C23H21O13 | 898.5 | 505.1248 | 505.0982116 | cyanidin     |
| Cyanidin 3-O-(2-xylosyl-6-(6'-caffeoyl-glucosyl)-galactoside)      | C41H45O23 | 358.6 | 905.2454 | 905.235152  | cyanidin     |
